# Supplementary material
Source: publisher site journal article supplement (https://www.dovepress.com/article/412131)
Supplement: Supplementary file 1 [file get_supplementary_file.php]

**Pain Sensitivity Questionnaire, PSQ**

The following scenarios describe how much pain you would feel if you were in the situation. Please choose a number on a scale of 0-10 to measure how much pain you would feel in the imagined scenario, with 0 being no pain at all, 1 being just painful and 10 being the maximum you can imagine. Please choose the number that matches your level of pain perception. There is no right or wrong answer, it is just your personal judgement. As far as possible, please do not let your fear or disgust of the imagined situation affect your assessment of the intensity of the pain you feel.

1 Imagine you bump your shin badly on a hard edge, for example, on the edge of a glass cofee table

□0 □1 □2 □3 □4 □5 □6 □7 □8 □9 □10

2 Imagine you burn your tongue on a very hot drink

□0 □1 □2 □3 □4 □5 □6 □7 □8 □9 □10

3 Imagine your muscles are slightly sore as the result of physical activity

□0 □1 □2 □3 □4 □5 □6 □7 □8 □9 □10

4 Imagine you trap your fnger in a drawer

□0 □1 □2 □3 □4 □5 □6 □7 □8 □9 □10

5 Imagine you take a shower with lukewarm water

□0 □1 □2 □3 □4 □5 □6 □7 □8 □9 □10

6 Imagine you have mild sunburn on your shoulders

□0 □1 □2 □3 □4 □5 □6 □7 □8 □9 □10

7 Imagine you grazed your knee falling of your bicycle

□0 □1 □2 □3 □4 □5 □6 □7 □8 □9 □10

8 Imagine you accidentally bite your tongue or cheek badly while eating

□0 □1 □2 □3 □4 □5 □6 □7 □8 □9 □10

9 Imagine walking across a cool tiled foor with bare feet

□0 □1 □2 □3 □4 □5 □6 □7 □8 □9 □10

10 Imagine your finger has a small cut, and salt is spilt on the wound accidentally

□0 □1 □2 □3 □4 □5 □6 □7 □8 □9 □10

11 Imagine a Chinese rose thorn pricks your fingertip

□0 □1 □2 □3 □4 □5 □6 □7 □8 □9 □10

12 Imagine you hold an ice pad for a few minutes with your bare hands

□0 □1 □2 □3 □4 □5 □6 □7 □8 □9 □10

13 Imagine you shake hands with someone who has a normal grip

□0 □1 □2 □3 □4 □5 □6 □7 □8 □9 □10

14 Imagine you shake hands with someone who has a very strong grip

□0 □1 □2 □3 □4 □5 □6 □7 □8 □9 □10

15 Imagine you pick up a hot pot by inadvertently grabbing its equally hot handles

□0 □1 □2 □3 □4 □5 □6 □7 □8 □9 □10

16 Imagine you are wearing sandals and someone with heavy boots steps on your foot

□0 □1 □2 □3 □4 □5 □6 □7 □8 □9 □10

17 Imagine you bump your elbow on the edge of a table (“funny bone”)

□0 □1 □2 □3 □4 □5 □6 □7 □8 □9 □10
